# Supplementary material
Source: PubMed Central journal article supplement (PMC10461844)

**Supplementary Figure 1. RNA expression levels of genes associated with infiltrating immune cells, muscle regeneration, and adult skeletal muscle in myositis and healthy control muscle biopsies.** The expression levels ( $\log_2[\text{FPKM} + 1]$ ) of gene markers for T-cells (CD3E, CD4, and CD8A) and macrophages (CD14 and CD68), as well as muscle regeneration (NCAM1, MYOG, MYH3, MYH8) and adult muscle structural proteins (ACTA1, TTN, MYH1, MYH2) are shown for each of the major muscle biopsy groups. NT, normal tissue; DM, dermatomyositis; IMNM, immune-mediated necrotizing myopathy; AS, antisynthetase syndrome; IBM, inclusion body myositis.

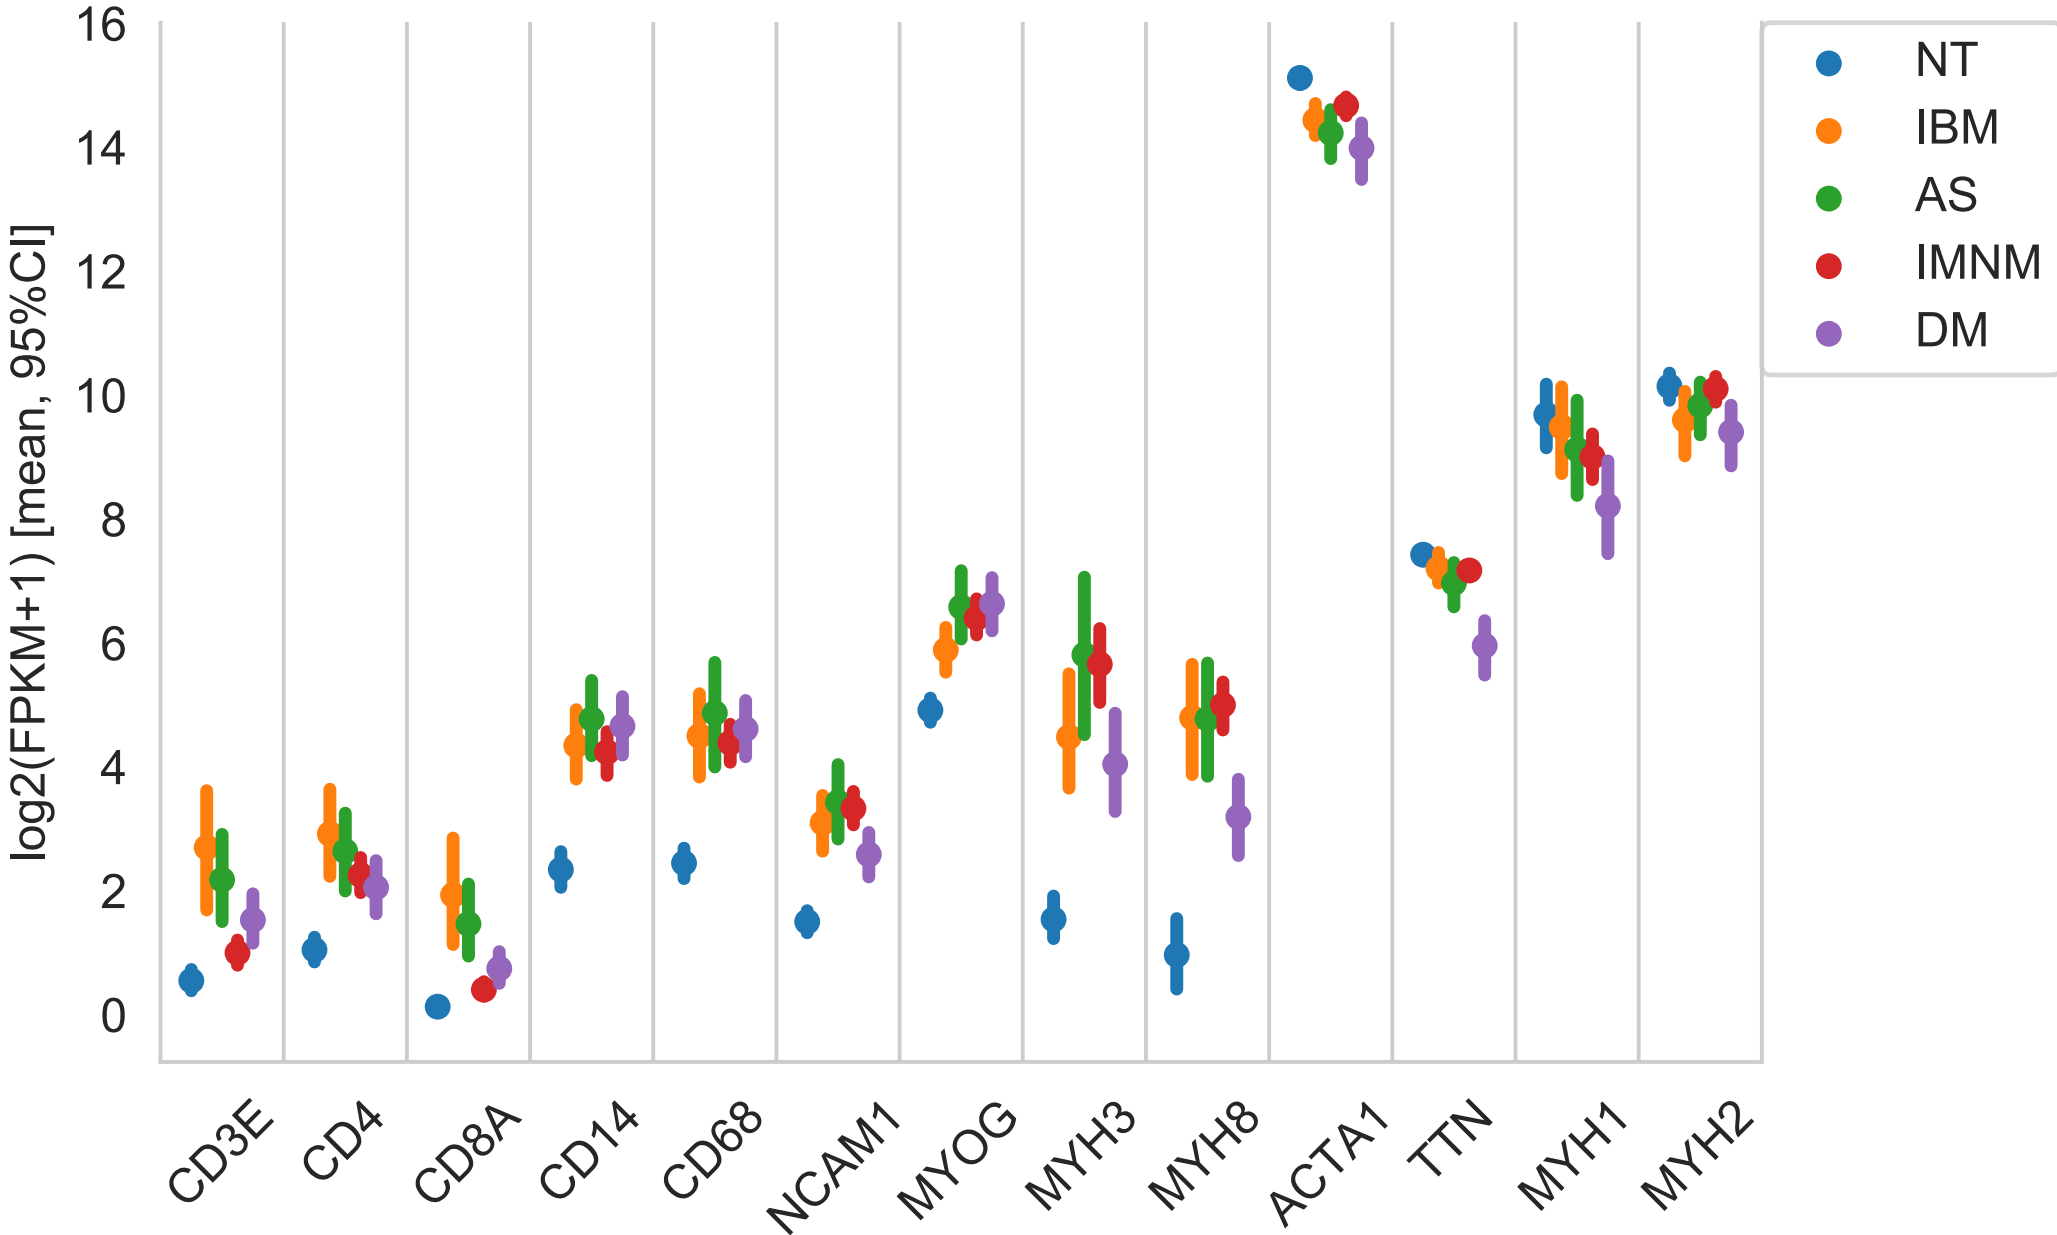

Supplement: NIHMS1919704-supplement-Fig_1.pdf [file NIHMS1919704-supplement-Fig_1.pdf]
