# Supplementary material
Source: PubMed Central journal article supplement (PMC10461844)

**Supplementary Figure 2. Genes expressed at high levels in IMNM are expressed at low levels in proliferating human myoblasts and at high levels as they differentiate into myotubes.** Evolution of the RNA expression levels ( $\log_2[\text{FPKM} + 1]$ ) of the 10 most significantly differentially expressed genes in IMNM during the differentiation of human skeletal muscle myoblasts (HSM) into myotubes. Proliferating myoblasts are placed in differentiation media on day 0 and allowed to differentiate into myotubes over the next 6 days.

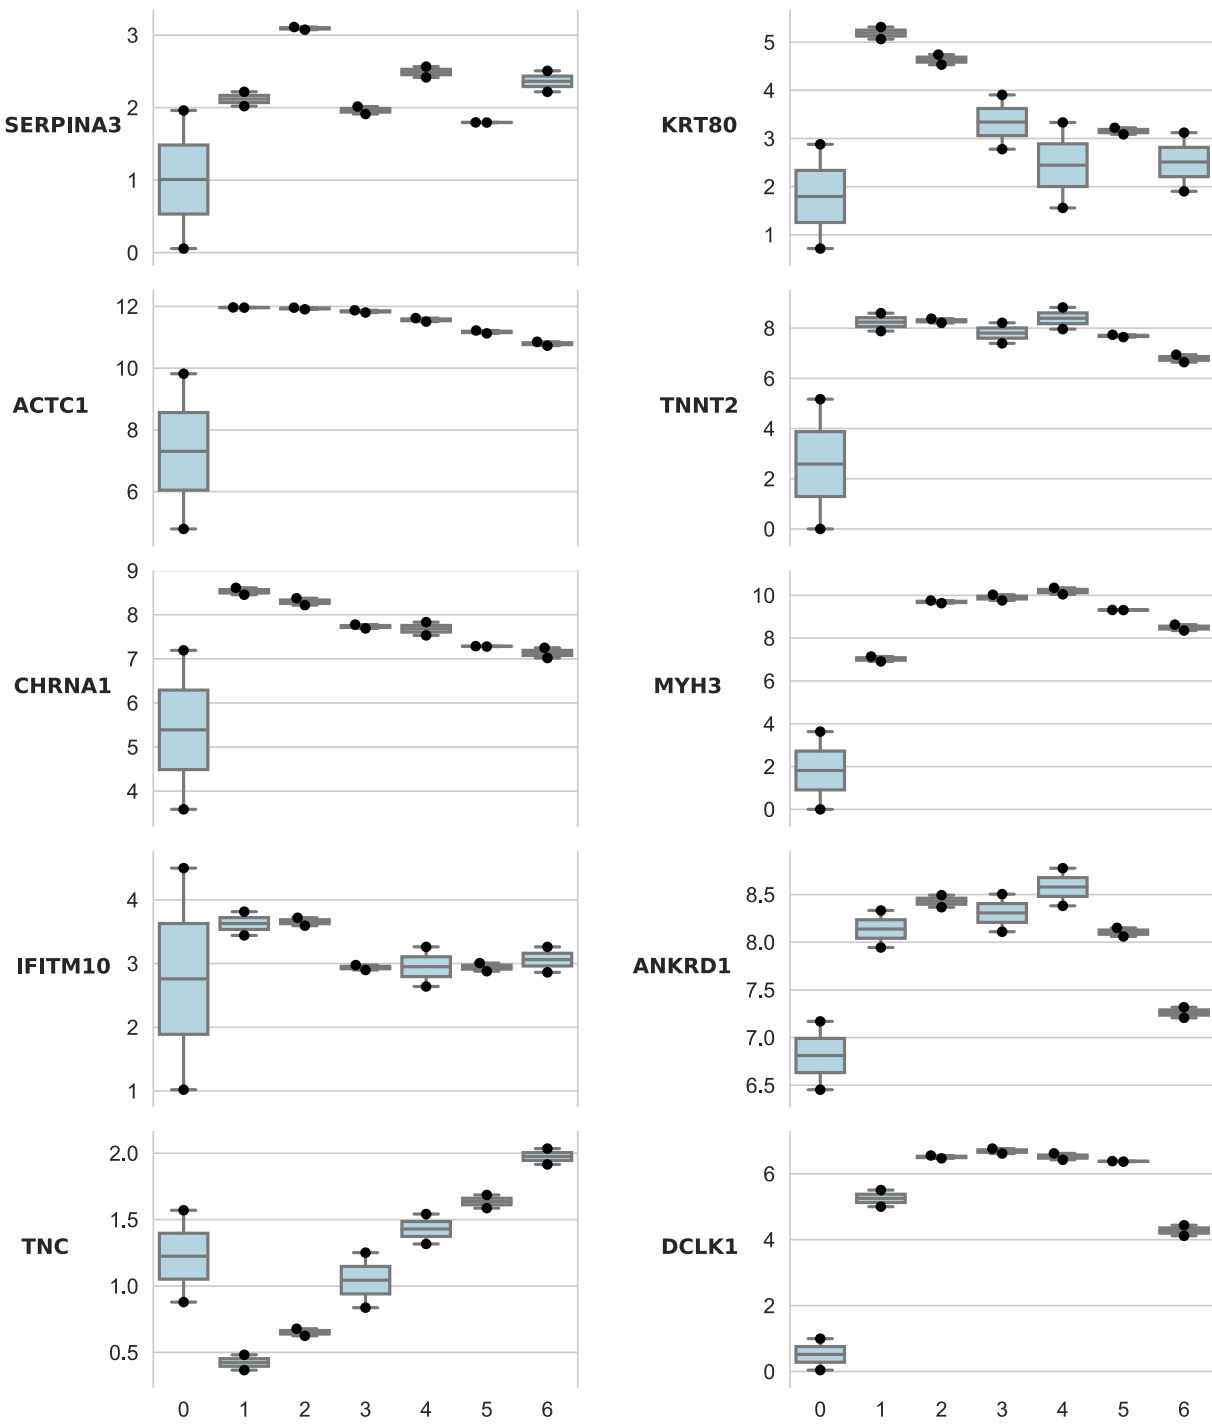

Supplement: NIHMS1919704-supplement-Fig_2.pdf [file NIHMS1919704-supplement-Fig_2.pdf]
