# Supplementary material
Source: PubMed Central journal article supplement (PMC10461844)

**Supplementary Figure 3. Genes expressed at high levels in IMNM are expressed at high levels during mouse muscle regeneration.** Evolution of the expression levels ( $\log_2[\text{FPKM} + 1]$ ) of the 10 most significantly differentially expressed genes in IMNM during mouse muscle regeneration. The tibialis anterior muscle was injected with cardiotoxin (CTX) on day 0 and allowed to regenerate for as long as 28 days. CTX day 0 corresponds to the contralateral (uninjured) tibialis anterior muscle.

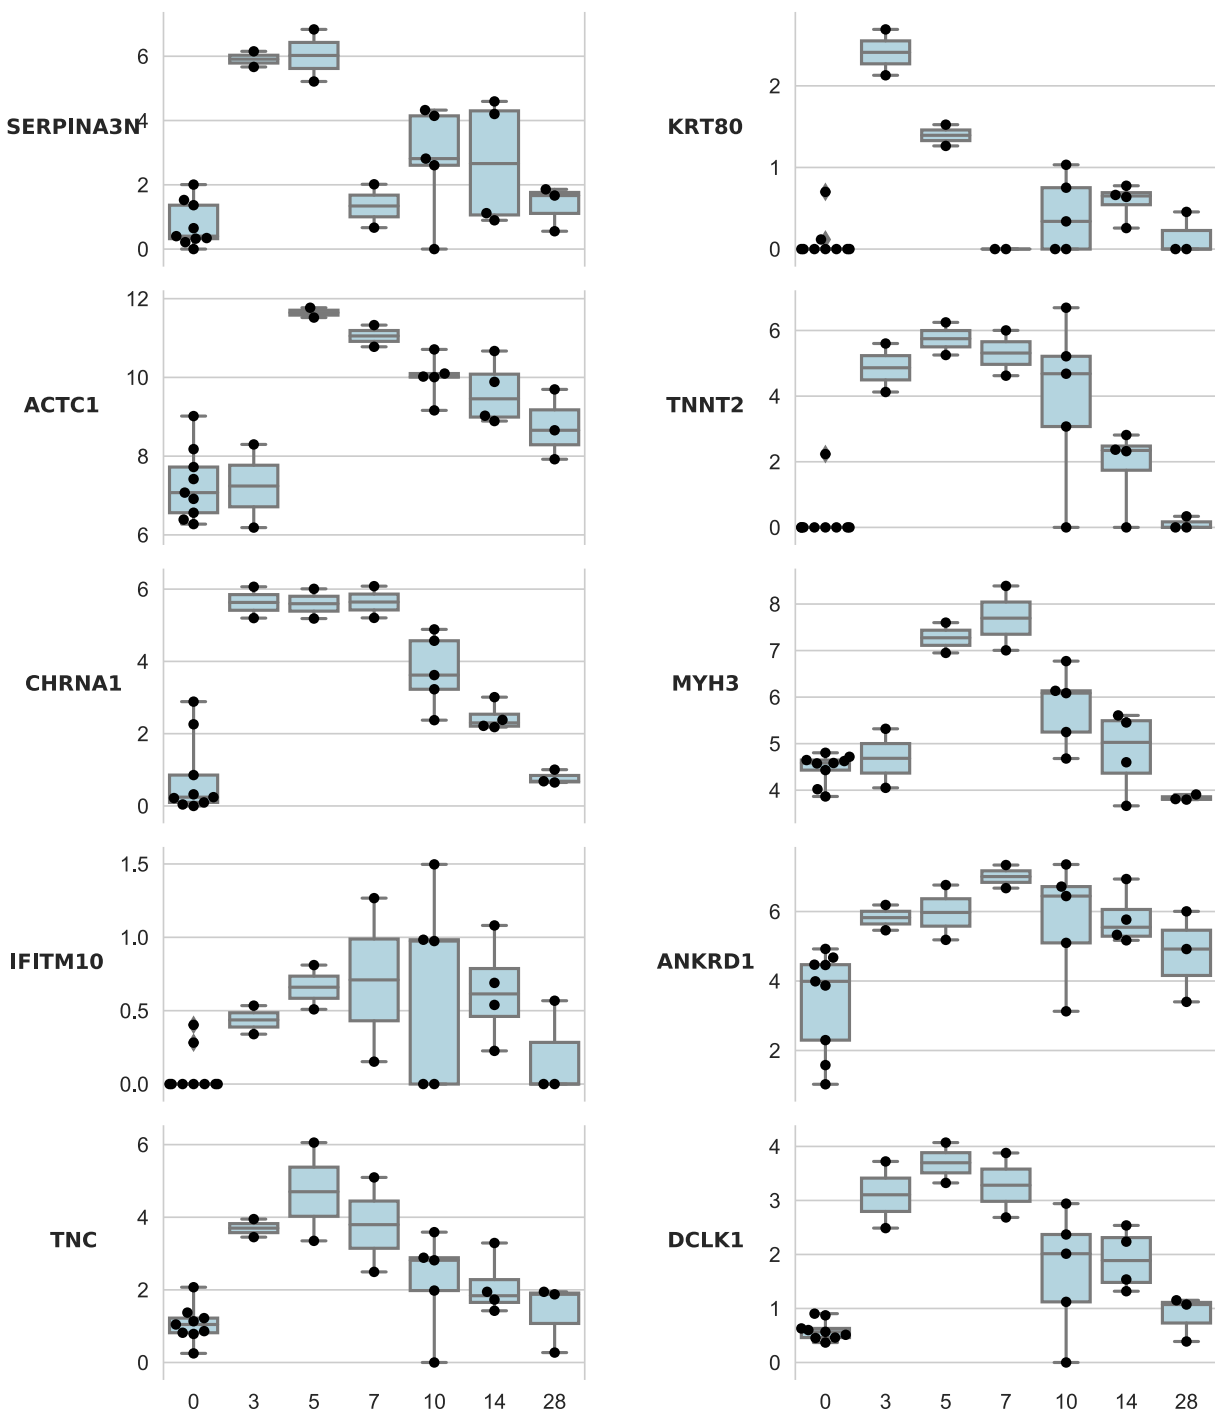

Supplement: NIHMS1919704-supplement-Fig_3.pdf [file NIHMS1919704-supplement-Fig_3.pdf]
