# Supplementary material
Source: PubMed Central journal article supplement (PMC10461844)

**Supplementary Figure 4. Muscle biopsies from all myositis groups express high levels of the most overexpressed genes in IMNM.** RNA expression levels ( $\log_2[\text{FPKM} + 1]$ ) of the 10 most upregulated genes in IMNM in all of the muscle biopsy groups. NT: normal tissue; DM: dermatomyositis; AS: antisynthetase syndrome; IBM: inclusion body myositis; IBM: inclusion body myositis.

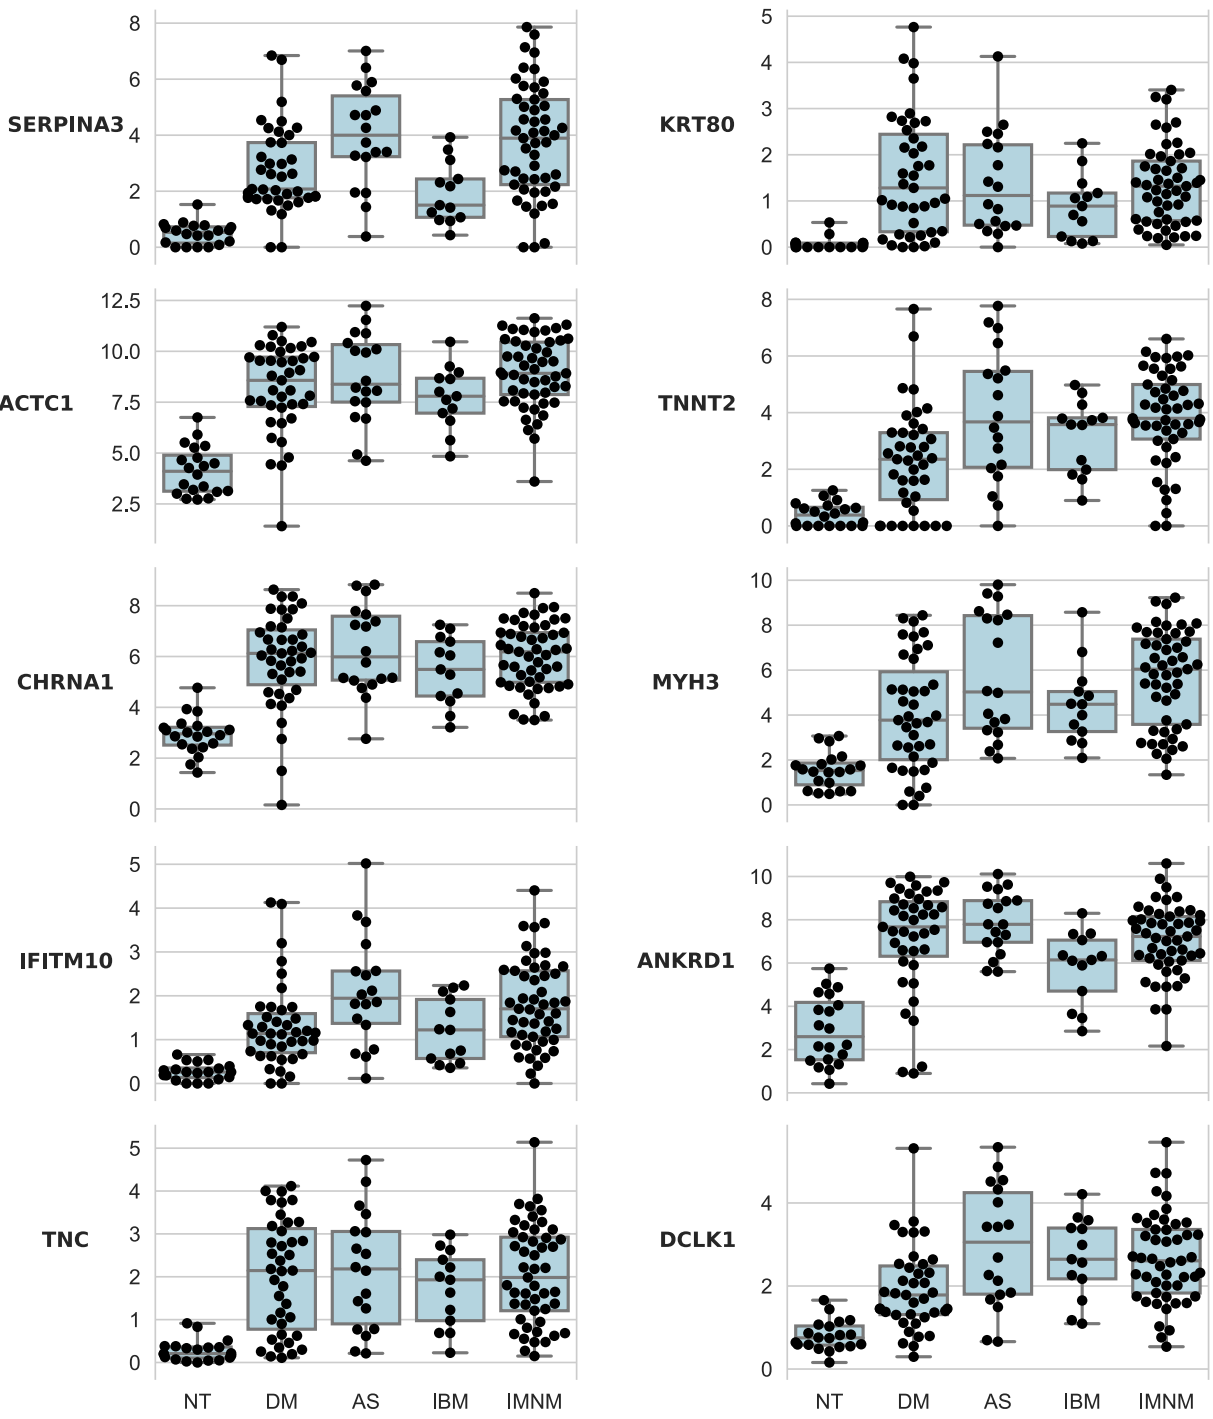

Supplement: NIHMS1919704-supplement-Fig_4.pdf [file NIHMS1919704-supplement-Fig_4.pdf]
